# Supplementary material
Source: HighWire-hosted journal article supplement (https://thorax.bmj.com/highwire/filestream/209586/field_highwire_adjunct_files/1/thorax-2023-220076supp002_data_supplement.pdf)
Supplement: thorax-2023-220076supp002_data_supplement.pdf [file thorax-2023-220076supp002_data_supplement.pdf]

## Phenotypic and genetically predicted leukocyte telomere length and lung cancer risk in the prospective UK Biobank

Wong JYY, Bletcher B, Hubbard AK *et al. Thorax* 2024. DOI: 10.1136/thorax-2023-220076

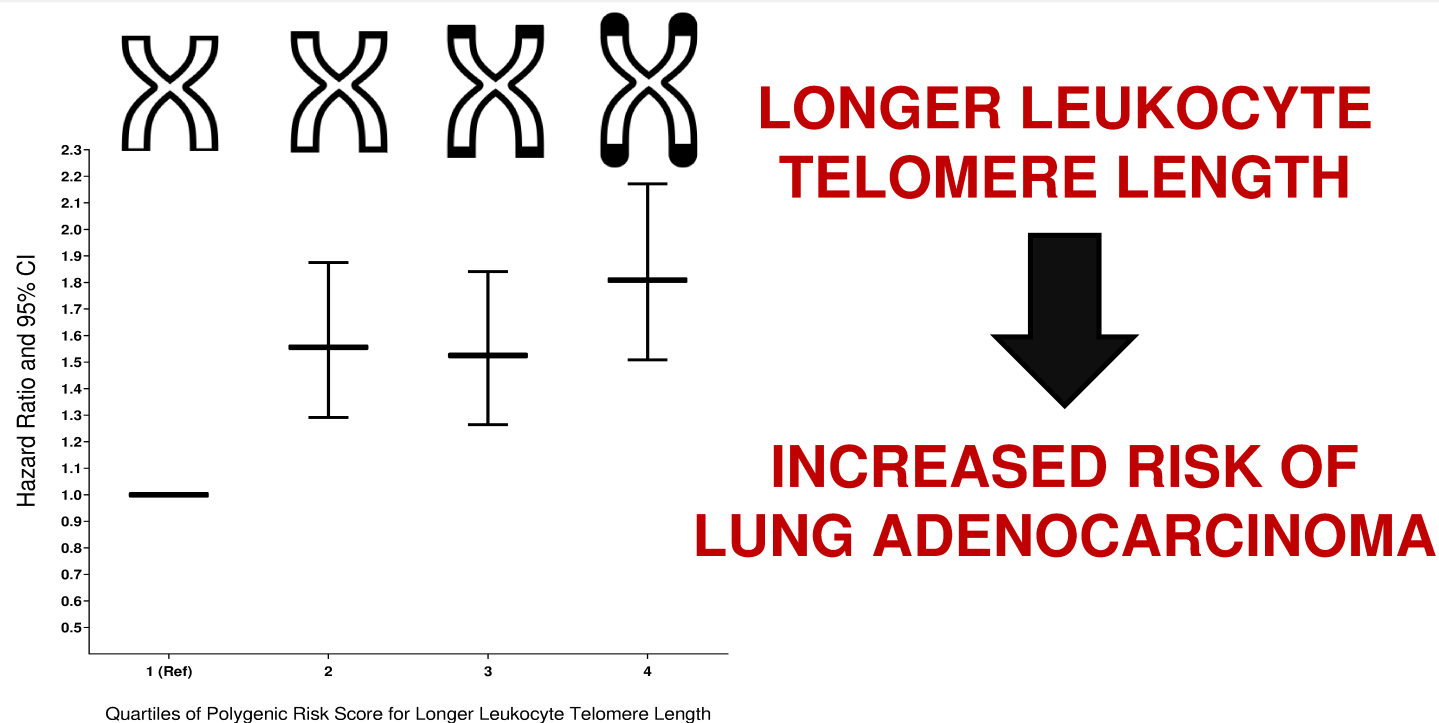

# Thorax

thorax.bmj.com

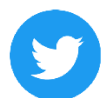

@ThoraxBMJ

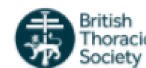

BMJ
